# Supplementary material for: Measurement Report: New particle formation characteristics at an urban and a mountain station in Northern China
Source: Copernicus journal article supplement (doi:10.5194/acp-2021-266), 2021-05-04
Supplement: Supplementary file [file acp-2021-266-RC2-supplement.pdf]

***Interactive comment on “Measurement Report: New particle formation characteristics at an urban and a mountain station in Northern China” by Y. Zhou et al.***

**Comments:**

This work reported simultaneous measurements of new particle formation at an urban and a mountain station in Northern China. The manuscript fits well to the scope of ACP, however, I do not think it represented new results or findings. The paper is worth to be published, but not in its current form. Thus I recommend it to be resubmitted if more analysis or dataset could be included.

Lots of paper about NPF in North China Plain have been published. I would suggest the authors demonstrate the new findings compared to the previous studies. As a measurement report, it only present one month data, I think this is enough. The conclusions did not show anything new.

The authors pointed out that NPF events at urban areas could have a bigger influence on global/regional climate and air pollution than those at clean areas. This should be considered in regional-scale aerosol models when estimating the budget of aerosol and CCN loadings. I agree with this, but how could we deal with it in the model. Maybe some exemplary cases and detailed discussions are more convincing.

to regional haze formation in the study. So I think this key word is not appropriate.

## References
